# Supplementary material for: Structural evolution of amorphous calcium sulfate nanoparticles into crystalline gypsum phase
Source: Royal Society of Chemistry journal article supplement (doi:10.1039/d0ce01173h), 2020-01-01
Supplement: d0ce01173h1.pdf [file d0ce01173h1.pdf]

## Supporting Information

### **Structural evolution of amorphous calcium sulfate nanoparticles into crystalline gypsum phase**

Caiyun Jia,<sup>a,b</sup> Luchao Wu,<sup>a</sup> Qiaoshan Chen,<sup>a</sup> Peng Ke,<sup>a</sup> James J. De Yoreo,<sup>b, c</sup> and Baohong Guan

<sup>a,d\*</sup>

<sup>a</sup>College of Environmental and Resource Sciences, Zhejiang University, Hangzhou 310058, China

<sup>b</sup>Physical Science Division, Pacific Northwest National Laboratory, Richland, WA 99352, USA

<sup>c</sup>Department of Materials Science and Engineering, University of Washington, Seattle, WA 98195, USA

<sup>d</sup>Key Laboratory of Environment Remediation and Ecological Health, Ministry of Education, Hangzhou 310058, China

## **This material includes**

### **Calculation of Supersaturation Index.**

**Fig. S1.** Spheroidal particles with an amorphous structure.

**Fig. S2.** HR-TEM image of particle 4 with prevalent growth of crystalline domains.

**Calculation of Supersaturation Index.** The saturation indexes (SI) for the three crystalline phases of calcium sulfate on the condition of mixing of the preheated  $\text{CaCl}_2$  (3.0 M, 115 mL, 90 °C) and  $\text{NaSO}_4$  (50 mM, 10 mL, 90 °C) solutions were calculated with PHREEQC. The solubility data used and the calculated SI values are as follows:

| Phase     | SI**  | log IAP | log K(363 K, 1 atm) |
|-----------|-------|---------|---------------------|
| Anhydrite | 1.61  | -3.51   | -5.12               |
| Bassanite | 1.254 | -3.56   | -4.814              |
| Gypsum    | 1.013 | -3.71   | -4.723              |

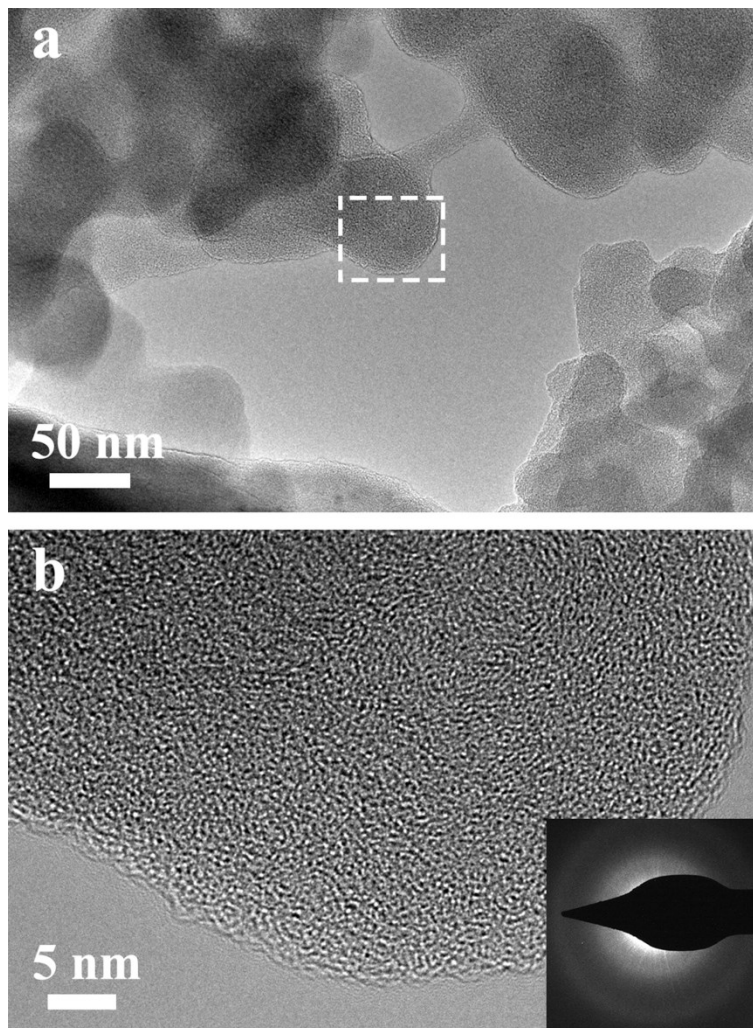

**Fig. S1 Spheroidal particles with an amorphous structure.** (a) TEM image of the particles precipitated at  $\text{CaSO}_4$  concentration of 5.52 mM and reaction time of 10 min. (b) HR-TEM image of the particle marked by white square in (a) and low-dose SAED pattern (inset). It is confirmed that the attached particles are amorphous and no nanocrystalline domain is formed.

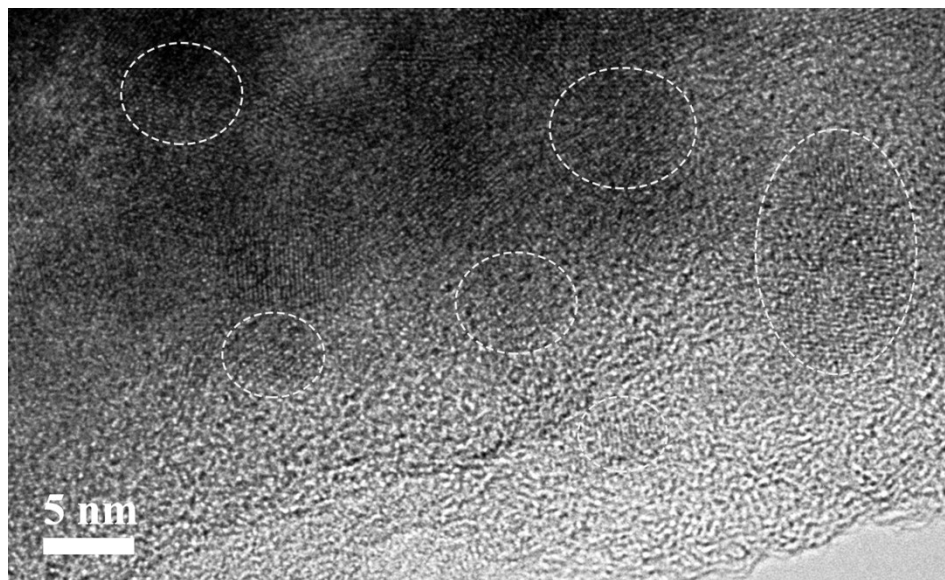

**Fig. S2 HRTEM image of gypsum particle with prevalent growth of crystalline domains.**

The areas highlighted by white curves show that the isolated crystalline domains grow close to each other with multiple crystallographic orientations of the lattice fringes.
